1 **The impact of heat stress on the human plasma lipidome**

2

3 Igor L. Estevao<sup>1</sup>, Josh B. Kazman<sup>3,4</sup>, Lisa M. Bramer<sup>1</sup>, Carrie Nicora<sup>1</sup>, Ming Qiang  
4 Ren<sup>3,4</sup>, Nyamkhishig Sambuughin<sup>3,4</sup>, Nathalie Munoz<sup>2</sup>, Young-Mo Kim<sup>1</sup>, Kent  
5 Bloodsworth<sup>1</sup>, Maile Richert<sup>3</sup>, Justin Teeguarden<sup>2</sup>, Kristin Burnum-Johnson<sup>2</sup>, Patricia A.  
6 Deuster<sup>3</sup>, Ernesto S. Nakayasu<sup>1\*</sup>, Gina Many<sup>1\*</sup>

7

8 <sup>1</sup>Biological Sciences Division and <sup>2</sup>Environmental and Molecular Sciences Division,  
9 Pacific Northwest National Laboratory, Richland, WA, 99352, USA.

10 <sup>3</sup>Consortium for Health and Military Performance, Department of Military and  
11 Emergency Medicine, F. Edward Hébert School of Medicine, Uniformed Services  
12 University, Bethesda, Maryland, USA.

13 <sup>4</sup>Henry M. Jackson Foundation for the Advancement of Military Medicine, Bethesda,  
14 Maryland, USA.

15 \*Corresponding author: Ernesto S. Nakayasu ([ernesto.nakayasu@pnnl.gov](mailto:ernesto.nakayasu@pnnl.gov)), Gina  
16 Many ([gina.many@pnnl.gov](mailto:gina.many@pnnl.gov))

17

18

19 **Abstract**

20 The year of 2023 displayed the highest average global temperatures since it has been  
21 recorded—the duration and severity of extreme heat are projected to increase. Rising  
22 global temperatures represent a major public health threat, especially to occupations  
23 exposed to hot environments, such as construction and agricultural workers, and first  
24 responders. Despite efforts of the scientific community, there is still a need to  
25 characterize the pathophysiological processes leading to heat related illness and  
26 develop biomarkers that can predict its onset. Here, we performed a plasma lipidomic  
27 analysis on male and female subjects who underwent heat tolerance testing (HTT),  
28 consisting of a 2-h treadmill walk at 5 km/h with 2% inclination at a controlled  
29 temperature of 40°C. We identified 995 lipids from 27 classes, with nearly half of all  
30 detected lipids being responsive to HTT. Lipid classes related to substrate utilization  
31 were predominantly affected by HTT, with a downregulation of triacylglycerols and  
32 upregulation of free fatty acids and acyl-carnitines (CARs). We additionally examined  
33 correlations between changes in plasma lipids by using the physiological strain index  
34 (PSI). Here, even chain CAR 4:0, 14:0 and 16:1, suggested by-products of incomplete  
35 beta oxidation, and diacylglycerols displayed the highest correlation to PSI. PSI did not  
36 correlate with plasma lactate levels, suggesting that correlations between even chain  
37 CARs and PSI is related to metabolic efficiency versus physical exertion. Overall, our  
38 results show that HTT has a strong impact on the plasma lipidome and that metabolic  
39 inefficiencies may underlie heat intolerance.

40

41 **Keywords:** Heat stress, plasma lipidomics, biomarkers, heat tolerance testing

42

## 43 **Background**

44 As the magnitude and frequency of extreme global temperatures continue to rise, the  
45 public health burden of heat-related illness is projected to increase dramatically [1-3].  
46 Workers from many occupations, including first responders, athletes, civil construction  
47 workers, and agricultural workers, are subjected to intense physical exertion in extreme  
48 temperatures (either heat or cold), chemical exposures, and psychological stressors.  
49 These exposures and stressors can cause major acute and chronic health problems,  
50 and in extreme cases, death [4, 5]. Our group has been performing multi-omics  
51 analyses to simultaneously study the mechanisms and biomarkers of these exposures  
52 and stressors [6, 7]. We investigated lipidomic responses to acute physical exertion to  
53 mimic field conditions in a cohort of wildland firefighters. Our results identified candidate  
54 biomarkers of strenuous exercise responses. We demonstrated that intense physical  
55 exertion alters omic profiles indicative of an increased susceptibility to respiratory  
56 infections and immune responses [6].

57 Heat exposure increases the incidence of heat-related illnesses, which are  
58 associated with exacerbated chronic illness, increased hospital admissions and risk of  
59 death [4, 5]. Excessive heat can denature proteins, destabilize lipoproteins, and liquefy  
60 cellular membranes, which can ultimately lead to tissue death and organ failure [8, 9].  
61 The compensatory physiological responses to heat stress include increases in  
62 metabolism, cardiac output, blood flow to the skin, and sweat rate [8]. Once the body's  
63 thermoregulatory mechanisms become overwhelmed, a spectrum of heat-related  
64 illnesses can emerge, ranging from heat cramps to heat exhaustion and life-threatening

65 conditions, such as heat stroke [10, 11]. The response to heat appears heterogeneous  
66 across populations and influenced by factors, such as body mass index (BMI),  
67 race/ethnicity, aerobic conditioning, and genetics [12-15]. However, the mechanisms  
68 and factors contributing to heat intolerance are largely unknown and understudied. Early  
69 studies in the field of exercise physiology allude to a role of increased glycolysis and  
70 decreased lipid metabolism in heat intolerant individuals [16], where relative workload  
71 demands (oxygen consumption) are reduced in heat tolerant individuals during acute  
72 heat exposure [17]. Aside from these studies, animal studies point to genetic influences  
73 [18, 19]. Recent human transcriptomic studies revealed differentially expressed genes  
74 encoding proteins involved in unfolded protein responses, energy metabolism, and  
75 immunity [9, 20]. To mitigate the health impacts of extreme heat in the public, we  
76 urgently need to better understand the molecular mechanisms of heat intolerance and  
77 identify their predictive biomarkers.

78 As the physicochemical properties of lipids are highly affected by high temperatures [21]  
79 and previous studies allude to changes in lipid oxidation and abundance in heat  
80 intolerance [16, 22, 23], we studied the effects of heat on the composition of lipids in  
81 human plasma. We performed lipidomic analyses of plasma from individuals who  
82 underwent HTT and analyzed changes in lipid profiles following acute HTT. We also  
83 investigated the heterogeneity of this response by sex and correlations between  
84 individual lipid species with the individual's exertional heat tolerance.

85

86

87

88

## 89 **Material and Methods**

90

### 91 Experimental design

92           Subjects were recruited under one of two studies to investigate physiological  
93 responses and clinical utility of a standardized HTT among recruits and service  
94 members referred for evaluation of heat tolerance. Subject eligibility criteria included:  
95 18-45 years of age; non-obese (waist circumferences <39.4 in); non-hypertensive  
96 (resting blood pressure < 140/90 mmHg); non-pregnant/lactating; free of cardiovascular  
97 disease; free of glucose or blood-pressure medications; not being treated for mental  
98 health disorder; no personal or family history of malignant hyperthermia. For subjects  
99 with prior exertional heat illness, testing had to occur at least six weeks after their last  
100 episode.

101           The study consisted of a baseline evaluation and of a HTT on separate days.  
102 The baseline evaluation included a demographic/medical history questionnaire,  
103 anthropometric assessment, and VO<sub>2</sub> Peak testing. Percentage body fat was assessed  
104 using the InBody 720, a multipoint bioelectrical impedance analyzer (InBody USA,  
105 Cerritos, CA). For the VO<sub>2</sub>Peak test, subjects underwent a 5 min warmup walk at 5.0  
106 km/h and 2.0% incline, while wearing a Polar heart rate monitor (Polar USA Inc, Lake  
107 Success, NY) and a mask to measure expired respiratory gasses using open-circuit  
108 spirometry (Oxycon Mobile portable system, Viasys Healthcare Inc, Yorba Linda, CA).  
109 Next, the treadmill went to 0.0% incline, and they ran at a constant speed between 7.7

110 and 13.7 km/h (exact speed depending on warm-up heart rate). The incline then  
111 increased by 2.5% every 2 min until exhaustion or VO<sub>2</sub> plateau [24].

112 For the HTT, participants arrived in the morning, and were dressed in shorts and  
113 a t-shirt. Women were tested between days three and nine of their follicular phase.  
114 Urine specific gravity had to be under 1.02 to ensure adequate hydration at baseline.  
115 Next, the HTT consisted of walking for 2 h at a pace of 5 km/h at 40 °C and 40% relative  
116 air humidity as described previously [25]. Real-time physiological measures included  
117 heart rate (HR) and core body temperature using a 10 cm rectal thermocouple (Type T  
118 Thermocouple with Thermes WiFi, Physitemp, Clifton, NJ). Participants were allowed to  
119 drink water *ad libitum*, up to one liter per hour.

120 The primary output from the HTT includes maximal HR and core body  
121 temperature during the last 5 minutes of walking. We also computed the PSI, based on  
122 change in HR and core temperature over the HTT [26]. PSI was used as the primary  
123 HTT outcome as it provides a continuous measure of both exercise and heat strain. The  
124 PSI equally weighs change in core temperature and HR over the test through an upper  
125 limit of 39.5 °C and 180 BPM, respectively. PSI ranges from 0 to 10, and values can be  
126 classified as minimal (0-2), low (3-4), moderate (5-7), high (7-8), and very high (9-10)  
127 [26]. The HTT protocol typically elicits a PSI level of around 4 or 5 [27], which is  
128 consistent with HTT being a moderately difficult heat challenge. Volunteers' blood was  
129 collected pre- and post-exercise by phlebotomy and immediately placed on ice. The  
130 post-exercise sample was collected within 10 min after the test. Blood was drawn into  
131 EDTA-tube (Vacutainer, BD, Franklin Lakes, NJ, USA), mixed by inverting the tube 10  
132 times, and immediately placed on ice. Plasma was then separated by centrifugation at

133 1000  $\times$ g for 10 min at room temperature. Separated plasma was visually inspected for  
134 coagulation and hemolysis, collected into 0.5-mL aliquots, and stored within 1 h of blood  
135 draw at -80 °C for lipidomics analysis.

136

### 137 Sample extraction

138 Plasma samples were extracted with the simultaneous metabolite, protein, and lipid  
139 extraction (MPLEx) protocol [28]. Samples (50  $\mu$ L) were loaded into 2-mL Sorenson  
140 M $\mu$ ITI™ SafeSeal™ tubes (Sorenson BioScience, Inc., Salt Lake City, UT, USA) with 10  
141  $\mu$ L SPLASH mix (in methanol) (Avanti Polar, Alabaster, AL, USA), and with 50  $\mu$ L of a  
142 metabolite internal standard mix (1 mg/mL in water each  $^2$ H<sub>4</sub>-malonic acid,  $^2$ H<sub>4</sub>-succinic  
143 acid,  $^2$ H<sub>5</sub>-glycine,  $^2$ H<sub>4</sub>-citric acid,  $^{13}$ C<sub>6</sub>-fructose,  $^2$ H<sub>5</sub>-tryptophan,  $^2$ H<sub>4</sub>-lysine,  $^2$ H<sub>7</sub>-alanine,  
144  $^2$ H<sub>35</sub>-stearic acid,  $^2$ H<sub>5</sub>-benzoic acid,  $^2$ H<sub>15</sub>-octanoic acid). Then, 390  $\mu$ L of 2:1 (v:v)  
145 chloroform/methanol solution was added and samples were vortexed vigorously and  
146 incubated on an ice block for 5 min. Lipids, metabolites, and proteins were extracted  
147 into different phases by centrifugation at 12000  $\times$ g for 10 min at 4 °C. The lipid layer  
148 (lower phase) was transferred into autosampler vials, dried in a vacuum centrifuge, and  
149 stored at -80 °C until liquid chromatography-tandem mass spectrometry (LC-MS/MS)  
150 analysis. The metabolite fraction was dried and incubated with 20  $\mu$ L of methoxyamine  
151 in pyridine (30 mg/mL) for 90 min at 37 °C with shaking. The samples were derivatized  
152 with 80  $\mu$ L of N-methyl-N-(trimethylsilyl)trifluoroacetamide with 1% trimethylchlorosilane  
153 for 1 h at 37 °C with shaking, and analyzed by gas chromatography-mass spectrometry  
154 (GC-MS).

155

156

157

### 158 Gas chromatography-mass spectrometry

159 Derivatized metabolite fractions were analyzed on an Agilent GC 7890A using a HP-  
160 5MS column (30m × 0.25mm × 0.25µm; Agilent Technologies, Santa Clara, CA, USA)  
161 coupled to a single quadrupole MSD 5975C (Agilent Technologies, Santa Clara, CA,  
162 USA). One microliter of sample was injected in splitless mode with the GC oven  
163 preconditioned to 60 °C. This temperature was maintained for 1 min after injection,  
164 followed by an increase to 325 °C at a rate of 10 °C/min and a 10-min hold at 325 °C. A  
165 fatty acid methyl ester standard mix (C8-28) (Sigma-Aldrich, Saint Louis, MO, USA) was  
166 run in the instrument at the beginning of each batch for retention time calibration  
167 purposes. Retention time calibration and spectra deconvolution of GC-MS files were  
168 done using Metabolite Detector (version 2, Technical University, Braunschweig,  
169 Germany) [29]. Metabolites were identified by matching against the FiehnLib library [30]  
170 or the NIST17/Wiley 11 GC-MS spectral databases.

171

### 172 Liquid chromatography-tandem mass spectrometry

173 Extracted and dried lipids were resuspended in 200 µL of 10% chloroform and 90%  
174 methanol. A total of 10 µL were loaded into a guard column (Acquity UPLC CSH C18  
175 VanGuard Pre-column, 130 Å, 1.7 µM, 2.1 mm x 5 mm, Waters). The separation was  
176 carried out in a reverse phase column (Acquity UPLC CSH C18 column, 130 Å, 1.7 µM,  
177 3.0 mm x 150 mm, Waters) connected to a Waters Acquity UPLC H class system  
178 (Waters Corp), maintained at 42 °C, over a 34 min gradient (mobile phase A: 40:60 (v:v)



179 acetonitrile:water containing 10 mM ammonium acetate; mobile phase B: 10:90 (v:v)  
180 acetonitrile:isopropanol containing 10 mM ammonium acetate), at a flow rate of 250  
181  $\mu\text{L}/\text{min}$  with the following gradient profile (min, %B) 0, 40; 2, 50; 3, 60; 12, 70; 15, 75;  
182 17, 78; 19, 85; 22, 92; 25, 99; 34, 99). Data were collected on an orbitrap mass  
183 spectrometer (Orbitrap Velos Elite, Thermo Fisher Scientific) in both positive and  
184 negative ionization modes. The MS1 scans were acquired at a range of  $m/z$  200–2000.  
185 The top 4 most intense parent ions were selected for alternating high-energy collision  
186 and collision-induced dissociations, with an activation Q value of 0.18 and 35  
187 normalized collision energy for collision-induced dissociation, and a normalized collision  
188 energy of 30 for high-energy collision dissociation.

189

#### 190 Lipid identification and quantitative information extraction

191 Raw LC-MS/MS files were converted to ABF format using Analysis Base File Converter  
192 (2011-2023 Reyfycs Inc.) and uploaded into MS-DIAL ver. 4.9.221218. MS-DIAL  
193 parameters were set for LC-MS/MS soft ionization and centroid data for MS1 and MS2.  
194 MS1 tolerance was set at 0.02 Da and MS2 at 0.025 Da. The minimum peak height was  
195 set at 10000. MS2 was deconvoluted and had chromatogram noise reduced with an  
196 abundance cutoff set as 5 in amplitude. The included adducts were  $[\text{M}-\text{H}]^-$ ,  $[\text{M}-\text{H}_2\text{O}-\text{H}]^-$ ,  
197 and  $[\text{M}+\text{Cl}]^-$  for negative mode, and  $[\text{M}+\text{H}]^+$ ,  $[\text{M}+\text{NH}_4]^+$ ,  $[\text{M}+\text{Na}]^+$ , and  $[\text{M}+\text{K}]^+$  for positive  
198 mode. The alignment retention time was set at 0.25 min. All other parameters were kept  
199 as default values. Data curation for identification and individual annotation of molecules  
200 were performed manually based on the retention time relative to the SPLASH mix  
201 standards, carbon chain length, and MS2 spectra matched with the reference. One

202 exception to this rule was the free fatty acids, which usually result in MS2 spectra  
203 without enough fragments for a confident identification. Because of its biological  
204 importance, we added the free fatty acid species for the statistical analysis and cross-  
205 validated it with the GC-MS data.

206

### 207 Statistical analysis

208 Peak intensity values from MS-DIAL processing were exported for statistical data  
209 analysis. All data processing, quality control, and normalization were done using smartR  
210 [31, 32]. Data was log2 transformed, and data quality was assessed by robust  
211 Mahalanobis distance to check for any outliers. Data was then normalized by global  
212 median centering. For each lipid, a mixed effects linear model was fit to account for the  
213 paired nature of the data; BMI, sex, timepoint, and interaction between sex and  
214 timepoint were included as fixed effects, and the subject was included as a random  
215 effect. The significance of lipid species abundances at pre- vs post-HTT was assessed  
216 using post-hoc comparisons, and a Benjamini-Hochberg p-value adjustment [33] was  
217 implemented. If the interaction term was significant post-hoc, comparisons of pre- vs  
218 post-heat tolerance for each sex were conducted with a Benjamini-Hochberg p-value  
219 adjustment applied. For each lipid, the correlation between heat tolerance index and  
220 lipid intensity change was assessed by the Pearson partial correlation test, while  
221 accounting for BMI [34]. Enrichment of regulated lipid classes were assessed by  
222 Fisher's exact test. Lipid networks were built with Cytoscape v3.9.1 [35].

223

## 224 Results

### 225 Physiological responses to HTT

226 Overall acute changes in plasma lipids to HTT were measured in a cohort of 33  
227 subjects, comprised of 26 male and 7 female subjects. The age of subjects spanned  
228 from 18 to 42 years. Subject anthropometric data are presented in Table 1. Changes in  
229 core temperature and HR were monitored throughout HTT as an indicator of heat  
230 tolerance. On average, baseline resting HR was 76 bpm, escalating to a final average  
231 HR of 123 bpm (Table 2). Baseline core temperatures commenced at an average of  
232 36.9°C, rising to an average 38.0 °C at the end of HTT (Table 2). PSI is scored on a 1-  
233 10 scale where a higher numerical value indicates reduced heat tolerance. PSI scores  
234 ranged from a mild physiological strain of 2.18, and reached up to a high strain of 7.42,  
235 with overall values averaging 4.46, indicative of moderate strain. Notably, the variance  
236 (standard deviation) in core temperature and PSI were similar between female and male  
237 subjects, suggestive of similar levels responses to HTT between sexes. The average  
238 baseline and final HR for female subjects were 82 bpm and 141 bpm, respectively,  
239 while for male subjects, these values were 75 and 119 bpm (Table 2).

240

241 **Table 1. Baseline physical characteristics of subjects prior to exertional heat**  
242 **tolerance testing.**

|                | n  | Age, years       | Weight, Kg            | PBF                    | BMI, kg/m <sup>2</sup> | VO <sub>2</sub> Peak, mL/Kg/min |
|----------------|----|------------------|-----------------------|------------------------|------------------------|---------------------------------|
| <b>Total</b>   | 33 | 25 ± 5.3 (18-42) | 78.45 ± 14.8 (50-125) | 16.7 ± 7 (3.0-31.5)    | 25.7 ± 3 (19.4-34.9)   | 48.75 ± 7.1 (36.2-59.5)         |
| <b>Females</b> | 7  | 26 ± 7.4 (20-42) | 60.75 ± 6.4 (50-69)   | 24.8 ± 5.3 (17.3-29.6) | 23.2 ± 2.1 (19.4-25.0) | 42.09 ± 4.1 (36.2-48.9)         |
| <b>Males</b>   | 26 | 25 ± 4.8 (18-37) | 83.21 ± 12.6 (66-125) | 14.5 ± 5.7 (3.0-31.5)  | 26.3 ± 2.9 (21.3-34.9) | 50.61 ± 6.7 (38.4-59.5)         |

243

244 **Table 1.** VO<sub>2</sub> Peak measurements were taken on 32 subjects (7 females and 25 males),  
245 whereas age, weight, percent body fat (PBF), and body mass index (BMI) were taken  
246 for 33 subjects. Data are represented as average, ± standard deviation and (range).

247

248 **Table 2. Physiological responses to exertional heat tolerance testing.**

|                | n  | PSI                 | Baseline Heart Rate, bpm | Final Heart Rate, bpm     | Baseline Core Temp (°C) | Final Core Temp (°C)   |
|----------------|----|---------------------|--------------------------|---------------------------|-------------------------|------------------------|
| <b>Total</b>   | 33 | 4.5 ± 1.1 (2.2-7.4) | 76 ± 13.4 (39-107)       | 123.4 ± 18.1 (88.4-158.5) | 36.9 ± 0.4 (36.3-37.9)  | 38 ± 0.4 (37.1-38.9)   |
| <b>Females</b> | 7  | 5.5 ± 1.1 (4.4-7.4) | 82 ± 21.8 (39-107)       | 140.5 ± 24.1 (88.4-158.5) | 36.9 ± 0.4 (36.3-37.4)  | 38.2 ± 0.4 (37.8-38.9) |
| <b>Males</b>   | 26 | 4.2 ± 0.9 (2.2-5.7) | 75 ± 10.2 (54-98)        | 118.8 ± 13.2 (97.4-143.8) | 36.9 ± 0.4 (36.4-37.9)  | 37.9 ± 0.4 (37.1-38.7) |

249

250 **Table 2.** Physiological strain index (PSI), baseline core temperature, and final core  
251 temperature measurements were taken for 32 subjects (7 females and 25 males),  
252 whereas baseline heart rate and final heart rate were taken for 33 subjects. Heart rate is  
253 represented in beats per minute (bpm). Data are represented as average, ± standard  
254 deviation and (range).

255

### 256 Changes in plasma lipids following HTT

257 Lipidomic analyses identified 995 lipids from 27 classes (Fig. 1A-B). Given a wide  
258 distribution of BMI in the data set (19.4-34.9 kg/m<sup>2</sup>), BMI was accounted for in statistical  
259 modeling. Further, given known sexual dimorphism in multiple metabolic processes [36],  
260 sex was included as a covariate in linear regression modeling. If a significant interaction  
261 between sex and timepoint was observed, changes in plasma lipids following HTT were  
262 assessed according to sex. After statistical analysis, 631 species had significant  
263 alterations, being 334 up- and 297 downregulated species, and 364 species were not

264 significant across the cohort (Fig. 1A). We then performed an enrichment analysis to  
265 determine changes in plasma lipids based on class. Among lipids classes that  
266 predominantly function as phospholipids, phosphatidylcholines (PCs) were generally  
267 upregulated, while phosphatidylinositols (PIs), phosphatidylethanolamines (PEs) and  
268 lysophosphatidylethanolamines (LPEs) were downregulated following HTT (Fig. 1B). Of  
269 the sphingolipid lipid class, sphingomyelins (SMs) and dihexosylceramides (Hex2Cers)  
270 were upregulated (Fig. 1B). Among the sterols, cholesteryl esters (CEs) were enriched  
271 in upregulated lipid species with HTT (Fig. 1B).

272       Regarding lipid classes involved in energy metabolism, triacylglycerols (TGs)  
273 were largely downregulated with HTT (Fig. 1B). Among TG species, the majority that  
274 decreased were medium to short chain TGs (<45 carbon in length) that were largely  
275 saturated (indicated by a decreased number of double bonds) (Fig. 2A-B). This  
276 suggested that these TG species are preferentially consumed to sustain energetic  
277 demands during exertional heat stress. Diacylglycerols (DGs), which are intermediate  
278 degradation products of TG metabolism and involved in cellular signaling, displayed 14  
279 species that increased and 9 that decreased with HTT (Fig. 1B). Both TGs and DGs are  
280 degraded into free fatty acids (FAs), which were enriched following HTT to include 36  
281 upregulated species (Fig. 1B). As FAs often result in low confidence identifications in  
282 LC-MS/MS analysis, we performed a GC-MS to validate changes in their abundances.  
283 We found 5 FAs in common between the LC-MS/MS and GC-MS analysis: 14:0, 16:0,  
284 16:1, 18:0, and 18:2. They all had similar patterns of upregulation after the HTT (Fig.  
285 S1), which validates the measurements of the LC-MS/MS analysis. In order for FAs to  
286 enter mitochondria for beta oxidation, they require conjugation to carnitines to form acyl-

287 carnitines. CAR species were highly enriched, with all 15 detected species displaying an  
 288 increase in abundance following HTT (Fig. 1B). The increase in CAR exemplifies the  
 289 systemic metabolic demands of 2 hours of exertional heat stress.

290

291 **Figure 1. Effects of exertional heat stress on the plasma lipidome.**

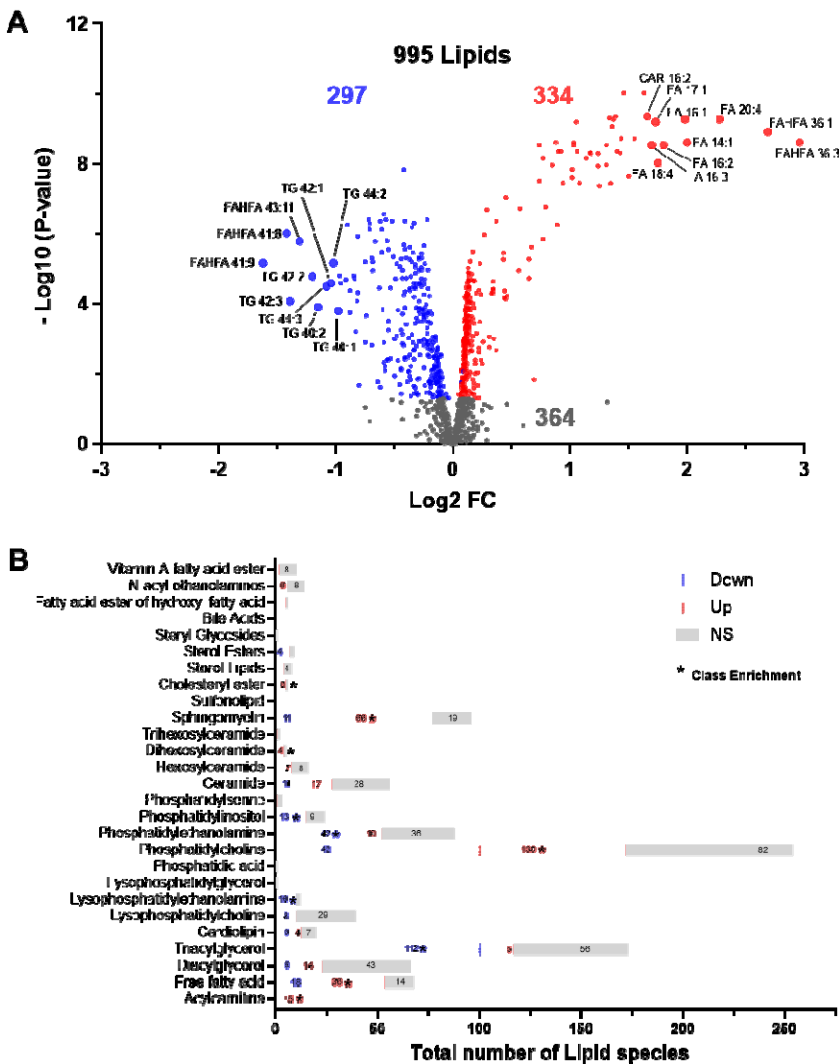

292

293 **Figure 1. Effects of exertional heat stress on the plasma lipidome. (A)** volcano plot  
 294 displaying the number of differentially regulated plasma lipid species following heat  
 295 tolerance testing, where each dot represents an individual lipid species. Upregulated

296 species are indicated by red, downregulated in blue and non-significant (NS). **(B)**  
297 Distribution of up- (red) and down- regulated (blue) lipids species according to class.  
298 Class enrichment was assessed by Fisher's exact test; p-values  $\leq 0.05$  are represented  
299 by asterisks (\*).

300

301 **Figure 2. Changes in triacylglycerol species distribution following exertional heat**  
302 **tolerance testing.**

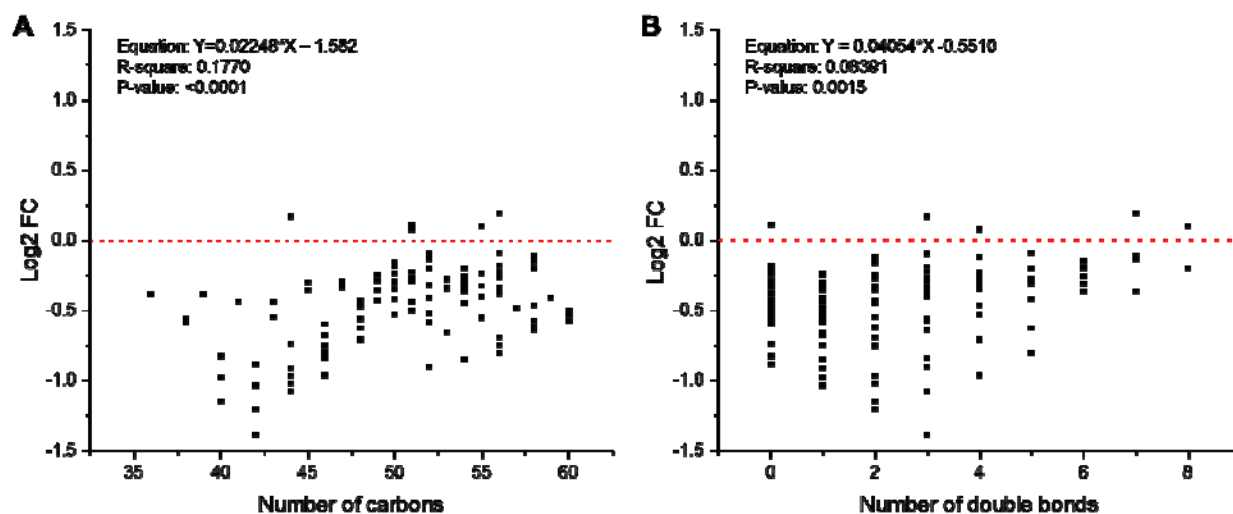

303

304

305 **Figure 2. Changes in triacylglycerol species distribution following exertional heat**  
306 **tolerance testing.** Changes in the triacylglycerol species distribution. A Linear  
307 regression curve was analyzed on log2 fold change values with exertion heat stress  
308 testing according to **(A)** carbon chain length and **(B)** double bond content.

309

310 We also investigated individual lipid species displaying the highest fold changes  
311 following HTT. Fifteen of the 20 most downregulated lipids were TGs, with the majority  
312 (70%) of the top 10 downregulated being short-chain saturated TG species, such as TG

313 40:1, 40:2 and 42:1 (Fig. 1A). This observation further supports that short-chain  
314 saturated TGs are preferentially utilized during HTT. We also observed that the  
315 relatively unexplored anti-inflammatory lipids, fatty acid ester of hydroxyl fatty acid  
316 (FAHFAs) [37] with long carbon chains and largely unsaturated (FAHFA 41:8, 41:9 and  
317 43:11) were among the most downregulated lipid species after HTT, suggesting cellular  
318 uptake or signaling. Conversely, the shorter largely saturated FAHFAs 36:1 and 36:3  
319 were among the most upregulated lipid species (Fig. 1A).

320

### 321 Sex-dependent differences in lipid profile changes

322 We next investigated sex differences in the lipidomic response to HTT. A total of  
323 117 lipid species exhibited a significant interaction with sex (Fig. 3A), indicating that the  
324 effects of HTT exposure differed in magnitude or direction between males and females.  
325 A total of 62 lipids were not regulated by the HTT, but had a significant sex interaction,  
326 reflecting basal sex differences in regulation of these lipids (Fig. 3A-B). Of the lipids with  
327 a significant by sex interaction, males and females shared 32 lipids that decreased and  
328 10 that increased, suggesting that the magnitude, but not direction, of change differed  
329 by sex (Fig. 3A). For instance, PE 18:0\_18:2 displayed similar reductions post HTT  
330 between sexes, but females had higher basal levels (Fig. 3C). Conversely, females had  
331 lower levels of CAR 16:0, but its abundance was raised to a similar final level in both  
332 sexes (Fig. 3D). Females displayed 10 lipids that increased and 3 that decreased  
333 following exertional heat stress that did not significantly change in males (Fig. 3A). This  
334 included PC 14:1\_20:3, which increased only in females following HTT (Fig. 3E),



335 whereas vitamin A fatty acid ester 21:0 decreased only in females (Fig. 3F). We next  
336 examined differences in lipid classes displaying a sex interaction.

337 Broadly, PC and SM lipids were the two primary lipid classes impacted by sex  
338 (Fig. 3G). PEs can be converted to PCs by methylation of their head group [38],  
339 whereas LPCs are formed by releasing FAs from PCs [39, 40]. Ceramides are  
340 converted to SMs by receiving the head groups from PCs [41-43], a class that displayed  
341 several of species impacted by sex (Fig. 3G), yet this lipid class did not display  
342 enrichment. Lipids related to energy metabolism, such as TGs, CARs, and FAs, had  
343 also numerous species impacted by sex and timepoint (Fig. 3G).

#### 344 Lipid correlates of exertional heat tolerance

345 We next sought to identify lipid species whose abundance profiles were  
346 associated with exertional heat tolerance. A higher PSI indicates reduced tolerance to  
347 exertional heat stress as indicated by a reduced ability to maintain HR and core body  
348 temperature during HTT [26]. We identified 26 and 35 lipids positively and negatively  
349 correlated with PSI, respectively. The lipid species were broadly distributed by class.  
350 Across sexes CAR species positively correlated with PSI (Fig. 4). The short chain acyl-  
351 carnitine, CAR 4:0, displayed the highest correlation to PSI, while long chain CARs,  
352 CAR 16:1 and 14:0 also displayed a significant correlation to PSI (Fig. 4). This paired  
353 with findings that short chain TGs, TG 8:0\_9:0\_11:0 and TG 8:0\_10:0\_15:2, were also  
354 positively associated with PSI. Conversely, medium to long chain TGs, such as TG  
355 16:0\_16:0\_19:0;O2 and TG 18:0\_18:1\_20:4, were inversely correlated with PSI (Fig. 4).  
356 The TG degradation intermediates, DGs were also enriched with 8 species positively  
357 correlated with the PSI (Fig. 4). To determine whether the increase of intermediates of

358 the energy metabolism was associated with higher physical exertion, we measured the  
359 lactate levels by GC-MS. No correlation was observed between PSI and change in  
360 plasma lactate levels or between PSI and final lactate levels (Fig S2A-B). In fact, only  
361 minor, not significant, changes in lactate levels were observed, an indication that the  
362 HTT is at relative low intensity for participants (Fig S2A-B). These results indicate that  
363 heat intolerance correlates with intermediates of lipid metabolism, but not necessarily  
364 with relative physical exertion during HTT.

365 Additionally, sex-specific differences in lipids correlated to PSI were observed. In  
366 females, the short chain FA, 16:3 displayed the strongest correlation with PSI.  
367 Additional FA and CAR species such as FA 18:4 and CARs 18:1, 18:2 and 16:2 showed  
368 positive associations with PSI in females, but not males. Further, females displayed a  
369 strong negative association of the docosahexaenoic acid (DHA)-containing PE O-40:6  
370 species ( $r = -0.95$ ) [44] that was not observed in males. In males but not females, the  
371 anti-inflammatory FAFHAs 36:1,O and 36:3,O were negatively correlated to PSI.  
372 Additionally, in males 10 DG species were positively correlated to PSI, whereas only  
373 DG 36:1 was positively correlated to PSI in females. In males, but not females, DG 36:3  
374 was negatively correlated to PSI. Interestingly DG 36:3 is reduced following sleep  
375 restriction [45], suggestive of its potential role as a biomarker of physiological stress.

376

377 **Figure 3. Differences in lipidomic responses to exertion heat stress testing**  
378 **between males and females.**

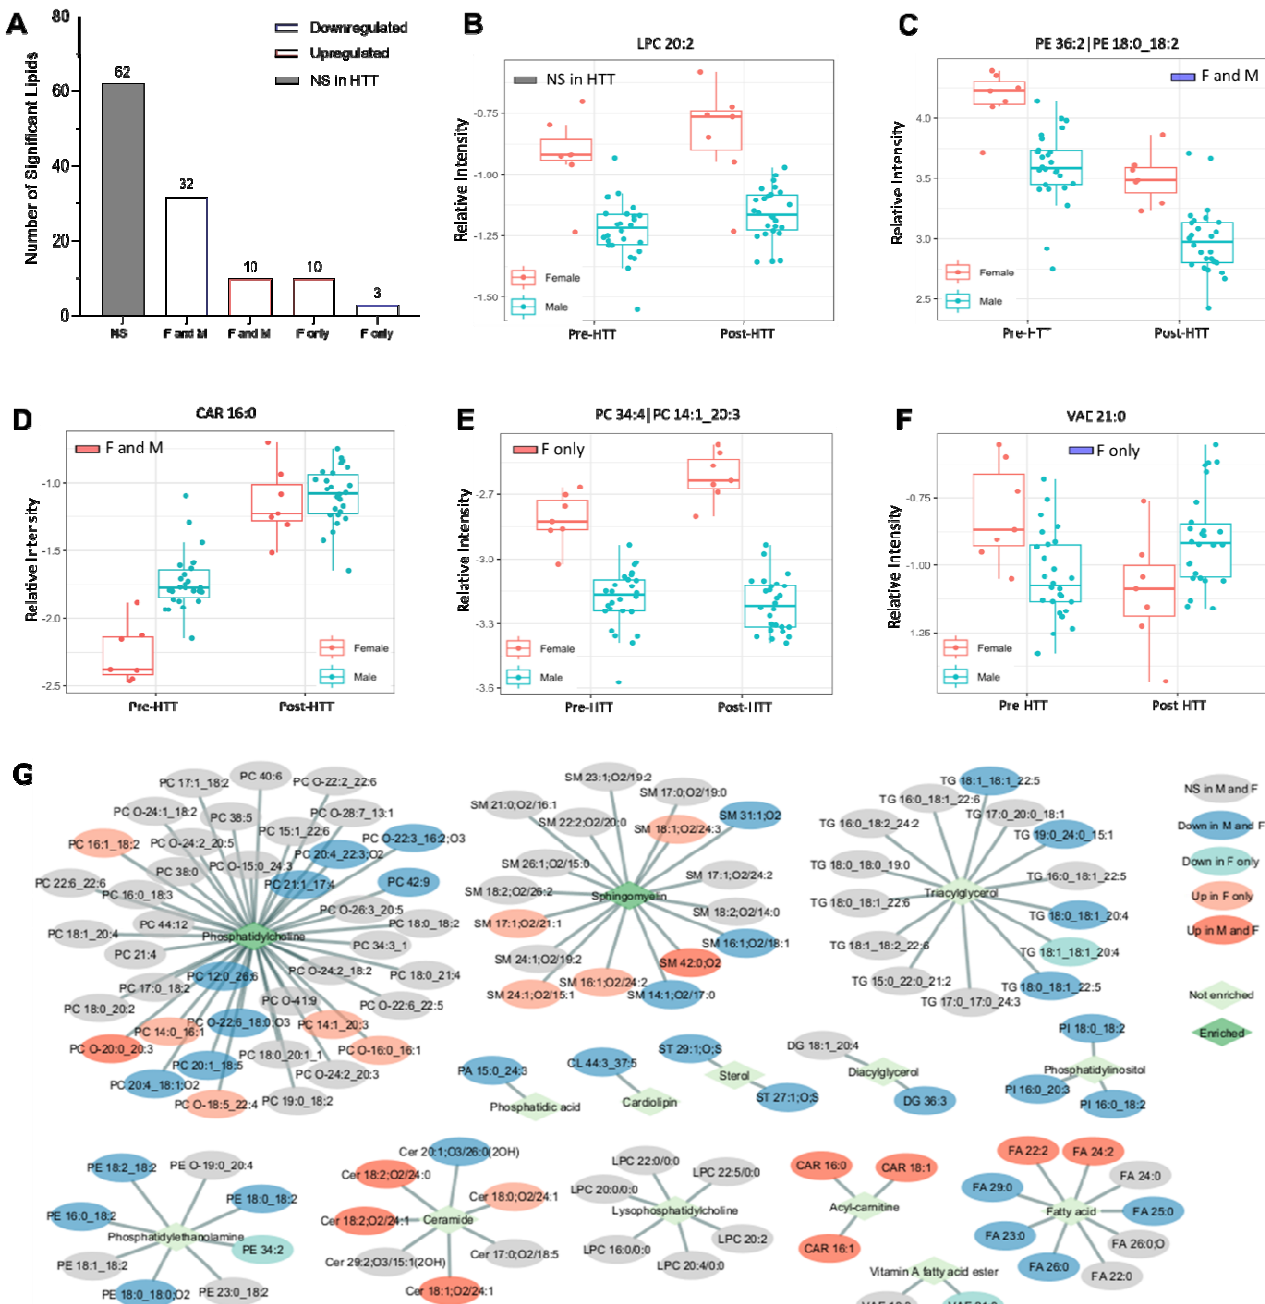

379

380

381 **Figure 3. Differences in lipidomic responses to exertion heat stress testing**

382 **between males and females. A.** The number of plasma lipids displaying a by sex and

383 timepoint interaction. Non-significant (NS) lipids (grey) represent those that are

384 impacted by sex but did not change significantly with heat tolerance testing. Statistically

385 significant down- and upregulated lipids that displayed a by sex and timepoint  
386 interaction are shown in blue and red, respectively. **B-F.** Box plots representing select  
387 lipid species from Fig. 3A. **G.** Network of individual lipid species and their corresponding  
388 lipid class that are significantly impacted by sex. Blue oval represents lipid species (LS)  
389 downregulated in both males and females, light turquoise color represents LS  
390 downregulated in females only, grey oval represents NS lipid species, light red  
391 represents upregulated LS in females only, and dark red oval indicates upregulated LS  
392 in males (M) and females (F). Light green rhombus is representative of a lipid class not  
393 significantly enriches, while a dark green rhombus is representative of enriched lipid  
394 classes.

395

396 **Figure 4. Computational network analysis of plasma lipid correlates to**  
397 **physiological strain index during heat tolerance testing.**

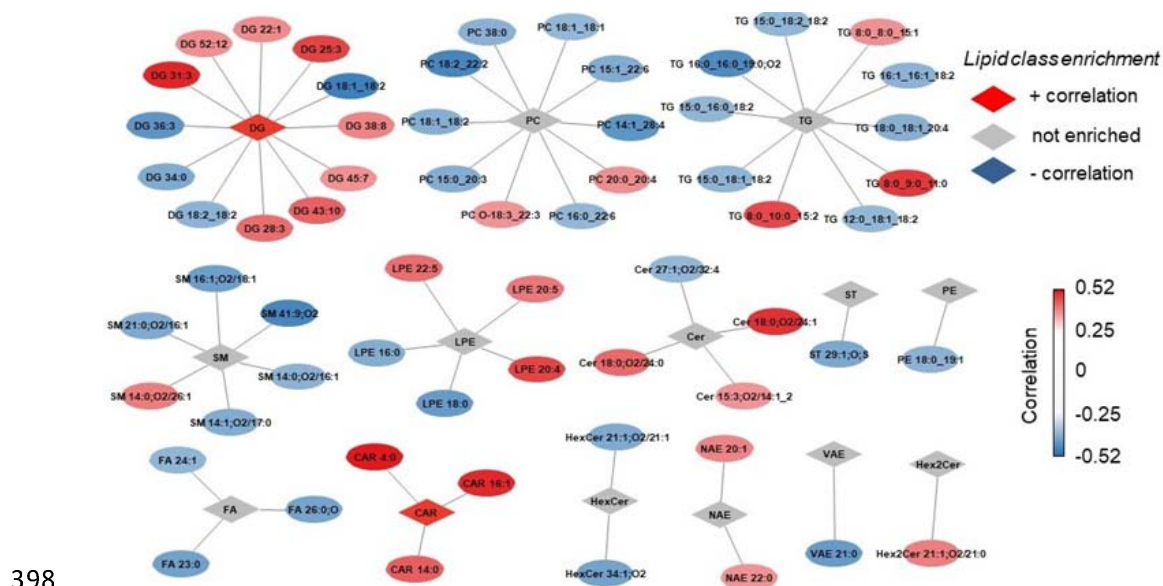

398

399 **Figure 4. Computational network analysis of plasma lipid correlates to**  
400 **physiological strain index during heat tolerance testing.** Visualization of positive

401 (red rhombus) and negative (blue rhombus) enriched lipid classes. Correlation score in  
402 red/blue color saturation on lipid species represents fold change.

403

## 404 **Discussion**

405 Given rising global temperatures, exertional heat stress poses a significant public health  
406 burden that is magnified in occupational workers, such as athletes and military service  
407 members, with prolonged outdoor environmental exposures. Despite observed  
408 differential gene expression responses to environmental heat [7, 9, 18-20, 46, 47],  
409 there is limited data explaining the underlying mechanisms of exertional heat  
410 intolerance, let alone targetable biomarkers linked to increased risk of heat-related  
411 illness. Here, we complete a thorough analysis of exertional heat stress-responsive  
412 plasma lipids in male and female subjects. We show that two hours of exertional heat  
413 stress dramatically impacts the plasma lipidome. Notable responses include CAR, FA,  
414 SM and PC mobilization and reduced levels of short, largely saturated TG lipid species.  
415 We also demonstrate that the plasma lipidomic response to HTT differs between males  
416 and females and specific lipid classes correlate with reduced heat tolerance, to  
417 converge on an association between plasma levels of even chain CAR species 4:0,  
418 14:0 and 16:1 and reduced heat tolerance. These findings were observed despite  
419 similar levels of physical exertion during HTT as indicated by plasma lactate levels.  
420 Together, our findings suggest that alterations lipid metabolism, among other changes  
421 in plasma lipid dynamics, underlie reduced tolerance to exertional heat stress.

422         Physiologically, a rise in core temperature or muscle temperature during exercise  
423 shifts substrate metabolism towards increased glycogen utilization and glycolysis [48,

424 49]. However, during heat acclimation substrate metabolism shifts to an increased  
425 reliance on lipids, likely in part facilitated by increased skeletal muscle FA uptake and  
426 utilization [16, 49, 50]. Here, we observed that HTT mobilized all detectable CAR  
427 species and broadly reduced short chain saturated TG species. Alterations in lipid  
428 classes such as TG, CAR, and DG highlight the intricate interplay between lipid  
429 metabolic systems in orchestrating the physiological response to thermal stress. We  
430 observed the TG intermediates, CAR, DG and ceramides, were correlated to heat  
431 intolerance in both sexes. CAR 4:0 displayed the highest correlation to PSI followed by  
432 DG 31:3, CAR 16:1 and ceramide 18:0;O2/24:1 This suggests an association between  
433 these lipids and heat intolerance. Incomplete beta oxidation results in accumulation of  
434 even chain CAR species and bi-products of amino acid catabolism to include CARs 3:0-  
435 5:0 [51].

436 Combined with an observed decrease in plasma TGs, this supports previous  
437 studies suggesting that glycogen sparing in the presence of increased lipid utilization  
438 fuels the increased metabolic demands of exertional heat stress in heat tolerant  
439 individuals [16, 22, 52]. It has been proposed that in insulin-resistance, which is  
440 characterized by mitochondrial dysfunction, fatty acyl-CoAs are diverted from transport  
441 to the inner mitochondria membrane and converted to DG and ceramide species [53].  
442 Therefore, our findings suggest that incomplete beta oxidation, as indicated by an  
443 increase in plasma even chain CAR and DG species, may underlie heat intolerance.

444 The even chain CAR 4:0, 14:0 and 16:0 are associated with diabetes have been  
445 shown to impair insulin signaling and promote oxidative stress in cultured muscle cells  
446 [54]. Elevated levels of CAR 4:0 is observed in Parkinson's disease models and genetic

447 diseases of inborn errors of metabolism [55, 56]. Here, the production of protein  
448 carbonyls in response to these CARs is blocked by the antioxidant N-acetylcysteine,  
449 which suggest that elevated levels of these CAR species may promote oxidative stress.  
450 Future studies examining the role of these CAR species in pathophysiological  
451 responses to exertional heat stress are thus warranted.

452 We also observed sexual dimorphism in plasma lipid correlates of heat  
453 intolerance. Females displayed additional even chain CAR (CAR 16:2, 18:1, 18:2), TG  
454 (FA 16:3, 18:4) and DG species (DG 14:0\_18:1) species that correlated with heat  
455 intolerance. Further, females displayed negative correlations of the DHA-containing PE  
456 O-40:6 species with PSI, suggesting a potentially protective role of DHA-containing  
457 lipids in exertional heat stress. In males, FAHFAs 36:1,O and 36:3,O which are  
458 suggested to have anti-inflammatory properties were negatively correlated to heat  
459 intolerance [57]. FAHFAs, branched fatty acid esters of hydroxy fatty acids, have been  
460 shown to have antidiabetic properties and attenuate LPS-mediated cytokine production.  
461 However, the molecular mechanisms by which they exert these properties are largely  
462 unknown [58]. It has been reported that physical activity promotes elevation of branched  
463 palmitic acid esters of hydroxy stearic acids (PAHSAs) in serum and adipose tissue.  
464 PAHSAs are FAHFA lipid mediators known for their insulin-sensitizing effects [59, 60]. It  
465 is therefore possible that FAHFA mobilize, or baseline levels are related to attenuated  
466 physiological response to exertional heat stress.

467 The current study is not without limitations. We included a cohort of relatively  
468 homogenous, physically fit adults. Given that heat intolerance is impacted by BMI, the  
469 responses in an obese cohort of subjects may differ [61]. Further, no subjects displayed



470 a highly elevated PSI in response to HTT. An expanded cohort of subjects, including  
471 those of lower fitness, elevated BMI and greater number of female participants will help  
472 to better establish plasma lipidomic biomarkers. Additionally, HTT was used to elicit a  
473 thermoregulatory response to exercise, alongside a “plateau” in HR and core  
474 temperature among individuals who are heat tolerant [62]. While the American College  
475 of Sports Medicine recommends HTT for return to sport, some limitations of the clinical  
476 utility of HTT have been proposed as it involves exercising at a relatively low intensity  
477 [63]. Additionally, examination of lipidomic changes, in addition to standard clinical  
478 analytes of plasma lipids, like total TG content and non-esterified fatty acids, may help  
479 facilitate the clinical utility of this work. As such, examination of biomarkers in field-  
480 based settings may offer additional insight into the pathophysiological mechanisms of  
481 exertional heat intolerance.

482 To examine the role of varying physical exertion during HTT, we assessed  
483 changes in plasma lactate and found no correlations with PSI. This supports the notion  
484 that metabolic efficiency versus the relative level of physical exertion drives  
485 physiological responses to exertional heat stress. Future studies examining or  
486 controlling for other variables of physical fitness in addition to studying molecular  
487 changes at the myocellular level will help to elucidate potential mitochondrial or  
488 metabolic alterations associated with heat intolerance that are independent of physical  
489 fitness. In summary, our findings provide insight into the plasma lipidomic responses to  
490 exertional heat stress and elucidate candidate pathways regulating heat intolerance.  
491 Further investigation into the molecular mechanisms underlying these lipidomic changes



492 promises to deepen our understanding of metabolic adaptation to environmental  
493 challenges and may hold relevance for the development of therapeutic interventions.

494

#### 495 **Ethics approval and consent to participate**

496 This study was performed in accordance with the World Medical Association,  
497 declaration of Helsinki and received approval from the Institutional Review Board (IRB)  
498 of the Uniformed Services University via protocol numbers: G191FY; FAM-81-3173-01.

499

#### 500 **Funding**

501 The project was funded by the BRAVE Agile Investment from the Pacific Northwest  
502 National Laboratory and the Office of Naval Research, grant no. N0001411MP20023,  
503 USA. ESN was partially supported by NIDDK/R01DK138335.

504

#### 505 **Authors' contributions**

506 ILE: Writing – original draft, methodology, data curation, investigation, data  
507 interpretation, review & editing. JBK: Investigation, methodology, writing, review &  
508 editing. LMB: Data analysis, writing, review & editing. CN: Investigation, sample  
509 preparation, writing and editing. MQR: Investigation, review & editing. NS: Investigation,  
510 review & editing. NMM: Investigation, writing & review. YMK: Investigation and review.  
511 KB: Investigation and review. MR: Investigation and review. JT: Investigation and  
512 review. KBJ: Investigation, writing & review. PAD: Investigation and review. ESN:  
513 Writing, methodology, data curation, investigation, conceptualization, review & editing,

514 data interpretation, resources, and supervision. GMM: Writing, methodology,  
515 investigation, conceptualization, review & editing, data interpretation, and supervision.

516

### 517 **Acknowledgements**

518 We would like to thank the staff members of the Pacific Northwest National Laboratory,  
519 a multi-program national laboratory operated by Battelle, Environmental Molecular  
520 Sciences Laboratory, for the Department of Energy (DOE) under contract No. DE-  
521 AC05-76RLO1830.

522

### 523 **Disclaimer statement**

524 The views and assertions expressed herein are those of the author(s) and do not  
525 necessarily reflect the official policy or position of the Department of the Army,  
526 Department of Energy, Defense Health Agency, Uniformed Services University, the  
527 Department of Defense, or the US Government. The contents of this publication are the  
528 sole responsibility of the author(s) and do not necessarily reflect the views, opinions, or  
529 policies of The Henry M. Jackson Foundation for the Advancement of Military Medicine,  
530 Inc. Mention of trade names, commercial products, or organizations does not imply  
531 endorsement by the U.S. Government.

532

### 533 **Competing interests**

534 The authors declare that they have no competing interests.

535 **Supplemental Figures**

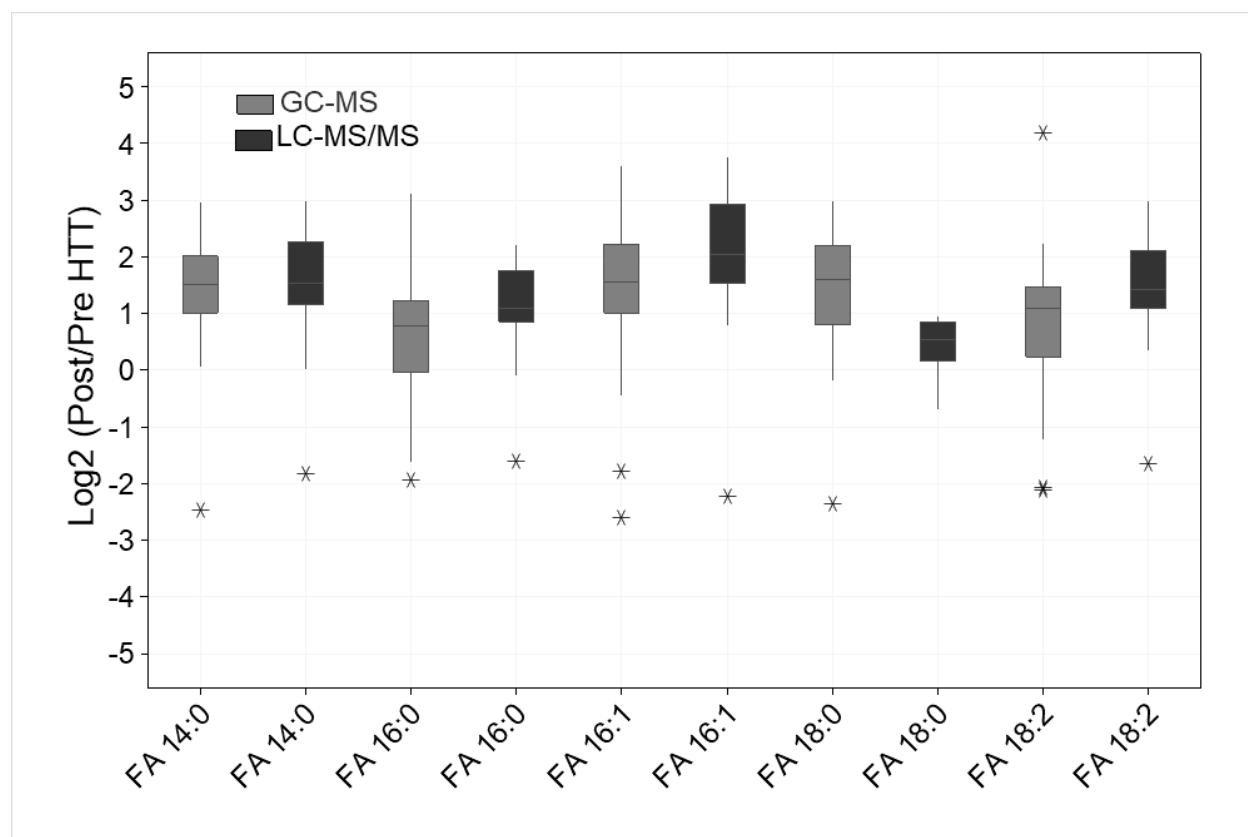

536

537 **Figure S1. Cross-validation of fatty acids by LC-MS/MS and GC-MS.** To confirm the  
538 fatty acid profiles observed by liquid chromatography-tandem mass spectrometry (LC-  
539 MS/MS), we performed gas chromatography-mass spectrometry (GC-MS) analysis,  
540 which showed similar fold change profiles.

541

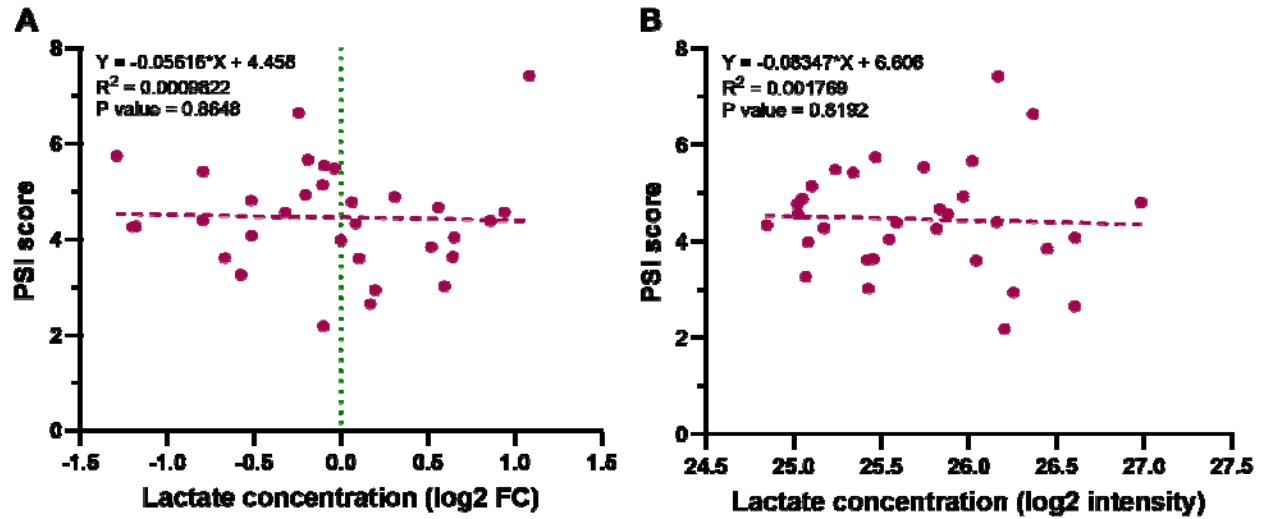

542

543 **Figure S2 - Correlation of heat tolerance score (PSI score) with plasma lactate. A.**

544 Correlation of PSI score with Post/Pre lactate levels (log2 fold change) in response to

545 the heat tolerance testing. **B.** Correlation of PSI score with the plasma lactate levels

546 immediately following heat tolerance testing.

547

548

## 549 References

- 550 1. Berberian, A.G., D.J.X. Gonzalez, and L.J. Cushing, *Racial Disparities in Climate*  
551 *Change-Related Health Effects in the United States*. *Curr Environ Health Rep*,  
552 2022. **9**(3): p. 451-464.
- 553 2. El Khayat, M., et al., *Impacts of Climate Change and Heat Stress on*  
554 *Farmworkers' Health: A Scoping Review*. *Front Public Health*, 2022. **10**: p.  
555 782811.
- 556 3. Williams, M.L., *Global warming, heat-related illnesses, and the dermatologist*. *Int*  
557 *J Womens Dermatol*, 2021. **7**(1): p. 70-84.
- 558 4. Pillai, S.K., et al., *Heat illness: predictors of hospital admissions among*  
559 *emergency department visits-Georgia, 2002-2008*. *J Community Health*, 2014.  
560 **39**(1): p. 90-8.
- 561 5. Schmeltz, M.T., E.P. Petkova, and J.L. Gamble, *Economic Burden of*  
562 *Hospitalizations for Heat-Related Illnesses in the United States, 2001-2010*. *Int J*  
563 *Environ Res Public Health*, 2016. **13**(9).
- 564 6. Nakayasu, E.S., et al., *Elucidating regulatory processes of intense physical*  
565 *activity by multi-omics analysis*. *Mil Med Res*, 2023. **10**(1): p. 48.
- 566 7. Ren, M.Q., et al., *Gene expression profiling of humans under exertional heat*  
567 *stress: Comparisons between persons with and without exertional heat stroke*. *J*  
568 *Therm Biol*, 2019. **85**: p. 102423.
- 569 8. Epstein, Y. and R. Yanovich, *Heatstroke*. *N Engl J Med*, 2019. **380**(25): p. 2449-  
570 2459.
- 571 9. Bouchama, A., et al., *A Model of Exposure to Extreme Environmental Heat*  
572 *Uncovers the Human Transcriptome to Heat Stress*. *Sci Rep*, 2017. **7**(1): p. 9429.
- 573 10. Gauer, R. and B.K. Meyers, *Heat-Related Illnesses*. *Am Fam Physician*, 2019.  
574 **99**(8): p. 482-489.
- 575 11. Periard, J.D., D. DeGroot, and O. Jay, *Exertional heat stroke in sport and the*  
576 *military: epidemiology and mitigation*. *Exp Physiol*, 2022. **107**(10): p. 1111-1121.
- 577 12. Gronlund, C.J., *Racial and socioeconomic disparities in heat-related health*  
578 *effects and their mechanisms: a review*. *Curr Epidemiol Rep*, 2014. **1**(3): p. 165-  
579 173.
- 580 13. Oda, J., et al., *Endogenous genetic risk factor for serious heatstroke: the*  
581 *thermolabile phenotype of carnitine palmitoyltransferase II variant*. *Acute Med*  
582 *Surg*, 2019. **6**(1): p. 25-29.
- 583 14. Giersch, G.E.W., et al., *Body mass index, but not sex, influences exertional heat*  
584 *stroke risk in young healthy men and women*. *Am J Physiol Regul Integr Comp*  
585 *Physiol*, 2023. **324**(1): p. R15-R19.
- 586 15. Lisman, P., et al., *Heat tolerance testing: association between heat intolerance*  
587 *and anthropometric and fitness measurements*. *Mil Med*, 2014. **179**(11): p. 1339-  
588 46.
- 589 16. Kirwan, J.P., et al., *Substrate utilization in leg muscle of men after heat*  
590 *acclimation*. *J Appl Physiol* (1985), 1987. **63**(1): p. 31-5.
- 591 17. Samueloff, S., *Metabolic aspects of desert adaptation (man)*. *Adv Metab Disord*,  
592 1974. **7**(0): p. 95-138.

- 593 18. Sejian, V., et al., *Review: Adaptation of animals to heat stress*. *Animal*, 2018.  
594 **12**(s2): p. s431-s444.
- 595 19. Abare, M.Y., S. Rahayu, and E. Tugiyanti, *Review: The role of heat shock*  
596 *proteins in chicken: Insights into stress adaptation and health*. *Res Vet Sci*, 2023.  
597 **165**: p. 105057.
- 598 20. McMahon, J.D., *Analyzing the health professions*. *J Sch Health*, 1987. **57**(8): p.  
599 342-3.
- 600 21. Torok, Z., et al., *Plasma membranes as heat stress sensors: from lipid-controlled*  
601 *molecular switches to therapeutic applications*. *Biochim Biophys Acta*, 2014.  
602 **1838**(6): p. 1594-618.
- 603 22. Fink, W.J., D.L. Costill, and P.J. Van Handel, *Leg muscle metabolism during*  
604 *exercise in the heat and cold*. *Eur J Appl Physiol Occup Physiol*, 1975. **34**(3): p.  
605 183-90.
- 606 23. Harbison, R.D., et al., *Synthesis and pharmacological study of a polymer which*  
607 *selectively binds mercury*. *Toxicol Appl Pharmacol*, 1977. **42**(3): p. 445-54.
- 608 24. Kyle, S.B., et al., *Variability of responses across training levels to maximal*  
609 *treadmill exercise*. *J Appl Physiol* (1985), 1989. **67**(1): p. 160-5.
- 610 25. Moran, D.S., T. Erlich, and Y. Epstein, *The heat tolerance test: an efficient*  
611 *screening tool for evaluating susceptibility to heat*. *J Sport Rehabil*, 2007. **16**(3):  
612 p. 215-21.
- 613 26. Moran, D.S., A. Shitzer, and K.B. Pandolf, *A physiological strain index to evaluate*  
614 *heat stress*. *Am J Physiol*, 1998. **275**(1): p. R129-34.
- 615 27. Kazman, J.B., et al., *Women and exertional heat illness: identification of gender*  
616 *specific risk factors*. *US Army Med Dep J*, 2015: p. 58-66.
- 617 28. Nakayasu, E.S., et al., *MPLEX: a Robust and Universal Protocol for Single-*  
618 *Sample Integrative Proteomic, Metabolomic, and Lipidomic Analyses*. *mSystems*,  
619 2016. **1**(3).
- 620 29. Hiller, K., et al., *MetaboliteDetector: comprehensive analysis tool for targeted and*  
621 *nontargeted GC/MS based metabolome analysis*. *Anal Chem*, 2009. **81**(9): p.  
622 3429-39.
- 623 30. Kind, T., et al., *FiehnLib: mass spectral and retention index libraries for*  
624 *metabolomics based on quadrupole and time-of-flight gas chromatography/mass*  
625 *spectrometry*. *Anal Chem*, 2009. **81**(24): p. 10038-48.
- 626 31. Stratton, K.G., et al., *pmartR: Quality Control and Statistics for Mass*  
627 *Spectrometry-Based Biological Data*. *J Proteome Res*, 2019. **18**(3): p. 1418-  
628 1425.
- 629 32. Degnan, D.J., et al., *pmartR 2.0: A Quality Control, Visualization, and Statistics*  
630 *Pipeline for Multiple Omics Datatypes*. *J Proteome Res*, 2023. **22**(2): p. 570-576.
- 631 33. Hochberg, Y.B.a.Y., *Controlling the False Discovery Rate: A Practical and*  
632 *Powerful Approach to Multiple Testing*. *Journal of the Royal Statistical Society*,  
633 1995. **57**(1): p. 289-300.
- 634 34. Kim, S., *ppcor: An R Package for a Fast Calculation to Semi-partial Correlation*  
635 *Coefficients*. *Commun Stat Appl Methods*, 2015. **22**(6): p. 665-674.
- 636 35. Shannon, P., et al., *Cytoscape: a software environment for integrated models of*  
637 *biomolecular interaction networks*. *Genome Res*, 2003. **13**(11): p. 2498-504.

- 638 36. Wang, X., F. Magkos, and B. Mittendorfer, *Sex differences in lipid and lipoprotein*  
639 *metabolism: it's not just about sex hormones*. J Clin Endocrinol Metab, 2011.  
640 **96**(4): p. 885-93.
- 641 37. Riecan, M., et al., *Branched and linear fatty acid esters of hydroxy fatty acids*  
642 *(FAHFA) relevant to human health*. Pharmacol Ther, 2022. **231**: p. 107972.
- 643 38. Hirata, F., et al., *Phospholipid methylation: a possible mechanism of signal*  
644 *transduction across biomembranes*. Prog Clin Biol Res, 1981. **63**: p. 383-8.
- 645 39. Law, S.H., et al., *An Updated Review of Lysophosphatidylcholine Metabolism in*  
646 *Human Diseases*. Int J Mol Sci, 2019. **20**(5).
- 647 40. Choi, J., et al., *Lysophosphatidylcholine is generated by spontaneous*  
648 *deacylation of oxidized phospholipids*. Chem Res Toxicol, 2011. **24**(1): p. 111-8.
- 649 41. McCluskey, G., et al., *The Role of Sphingomyelin and Ceramide in Motor Neuron*  
650 *Diseases*. J Pers Med, 2022. **12**(9).
- 651 42. Jeckel, D., et al., *Glucosylceramide is synthesized at the cytosolic surface of*  
652 *various Golgi subfractions*. J Cell Biol, 1992. **117**(2): p. 259-67.
- 653 43. Taniguchi, M. and T. Okazaki, *The role of sphingomyelin and sphingomyelin*  
654 *synthases in cell death, proliferation and migration-from cell and animal models*  
655 *to human disorders*. Biochim Biophys Acta, 2014. **1841**(5): p. 692-703.
- 656 44. Jiang, N., et al., *Administration of a competitive NMDA antagonist MDL-100,453*  
657 *reduces infarct size after permanent middle cerebral artery occlusion in rat*. J  
658 Neurol Sci, 1996. **138**(1-2): p. 36-41.
- 659 45. Forrest, I.S., A.G. Bolt, and R.C. Aber, *Metabolic pathways for the detoxication of*  
660 *chlorpromazine in various mammalian species*. Agressologie, 1968. **9**(2): p. 259-  
661 65.
- 662 46. Leiva, D.F. and B. Church, *Heat Illness*, in *StatPearls*. 2024: Treasure Island  
663 (FL).
- 664 47. Lugo-Amador, N.M., T. Rothenhaus, and P. Moyer, *Heat-related illness*. Emerg  
665 Med Clin North Am, 2004. **22**(2): p. 315-27, viii.
- 666 48. Febbraio, M.A., et al., *Blunting the rise in body temperature reduces muscle*  
667 *glycogenolysis during exercise in humans*. Exp Physiol, 1996. **81**(4): p. 685-93.
- 668 49. Starkie, R.L., et al., *Effect of temperature on muscle metabolism during*  
669 *submaximal exercise in humans*. Exp Physiol, 1999. **84**(4): p. 775-84.
- 670 50. King, D.S., et al., *Muscle metabolism during exercise in the heat in*  
671 *unacclimatized and acclimatized humans*. J Appl Physiol (1985), 1985. **59**(5): p.  
672 1350-4.
- 673 51. Koves, T.R., et al., *Mitochondrial overload and incomplete fatty acid oxidation*  
674 *contribute to skeletal muscle insulin resistance*. Cell Metab, 2008. **7**(1): p. 45-56.
- 675 52. Febbraio, M.A., *Alterations in energy metabolism during exercise and heat*  
676 *stress*. Sports Med, 2001. **31**(1): p. 47-59.
- 677 53. Morino, K., K.F. Petersen, and G.I. Shulman, *Molecular mechanisms of insulin*  
678 *resistance in humans and their potential links with mitochondrial dysfunction*.  
679 Diabetes, 2006. **55 Suppl 2**(Suppl 2): p. S9-S15.
- 680 54. Justinbesancon, L., et al., *[The gastric mucosa in aged patients. Biologic and*  
681 *anatomic study]*. Sem Hop, 1966. **42**(3): p. 145-54.
- 682 55. Zafeiriou, D.I., et al., *Ethylmalonic encephalopathy: clinical and biochemical*  
683 *observations*. Neuropediatrics, 2007. **38**(2): p. 78-82.



- 684 56. Hecker, R.B., *Spinal narcotics for chronic noncancer pain warrants further*  
685 *investigation*. J Am Osteopath Assoc, 1994. **94**(6): p. 477-8.
- 686 57. Aryal, P., et al., *Distinct biological activities of isomers from several families of*  
687 *branched fatty acid esters of hydroxy fatty acids (FAHFAs)*. J Lipid Res, 2021. **62**:  
688 p. 100108.
- 689 58. Frankel, H.H., *State-by-state pharmaceutical formulations?* N Engl J Med, 1993.  
690 **328**(20): p. 1500-1.
- 691 59. Brezinova, M., et al., *Exercise training induces insulin-sensitizing PAHSAs in*  
692 *adipose tissue of elderly women*. Biochim Biophys Acta Mol Cell Biol Lipids,  
693 2020. **1865**(2): p. 158576.
- 694 60. Benlebna, M., et al., *Long-term intake of 9-PAHPA or 9-OAHPA modulates*  
695 *favorably the basal metabolism and exerts an insulin sensitizing effect in*  
696 *obesogenic diet-fed mice*. Eur J Nutr, 2021. **60**(4): p. 2013-2027.
- 697 61. Mun, S., K. Park, and S. Lee, *Evaluation of thermal sensitivity is of potential*  
698 *clinical utility for the predictive, preventive, and personalized approach advancing*  
699 *metabolic syndrome management*. EPMA J, 2022. **13**(1): p. 125-135.
- 700 62. Stearns, R.L., et al., *Heat Tolerance Testing*, in *Sport and Physical Activity in the*  
701 *Heat: Maximizing Performance and Safety*, D.J. Casa, Editor. 2018, Springer  
702 International Publishing: Cham. p. 213-227.
- 703 63. Johnson, E.C., et al., *Specific exercise heat stress protocol for a triathlete's*  
704 *return from exertional heat stroke*. Curr Sports Med Rep, 2013. **12**(2): p. 106-9.

705
